# Supplementary material
Source: Springer Nature journal article supplement (https://www.springermedizin.de/resource/supplementary/12891_2010_1083_MOESM1_ESM.pdf/9507672)

**Percent change in DXR-MCI**

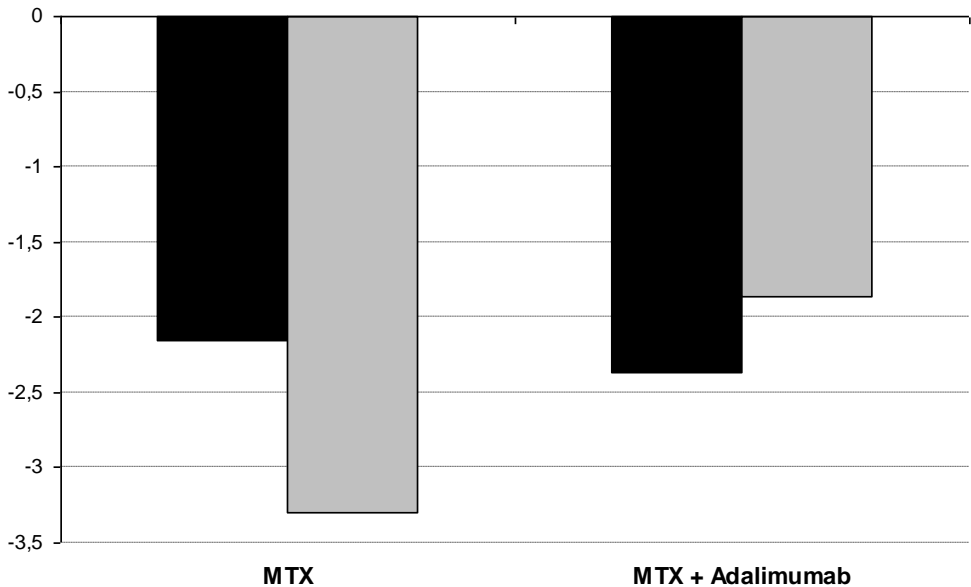

■ Low disease activity ■ DAS28 > 3.2

Supplement: MOESM1 [file 9507672]
